# Supplementary material for: Efficacy of Andrographis paniculata against extended spectrum β-lactamase (ESBL) producing E. coli
Source: PubMed Central journal article supplement (PMC6122548; doi:10.1186/s12906-018-2312-8), 2018-09-03
Supplement: 12906_2018_2312_MOESM1_ESM.pdf [file 12906_2018_2312_MOESM1_ESM.pdf]

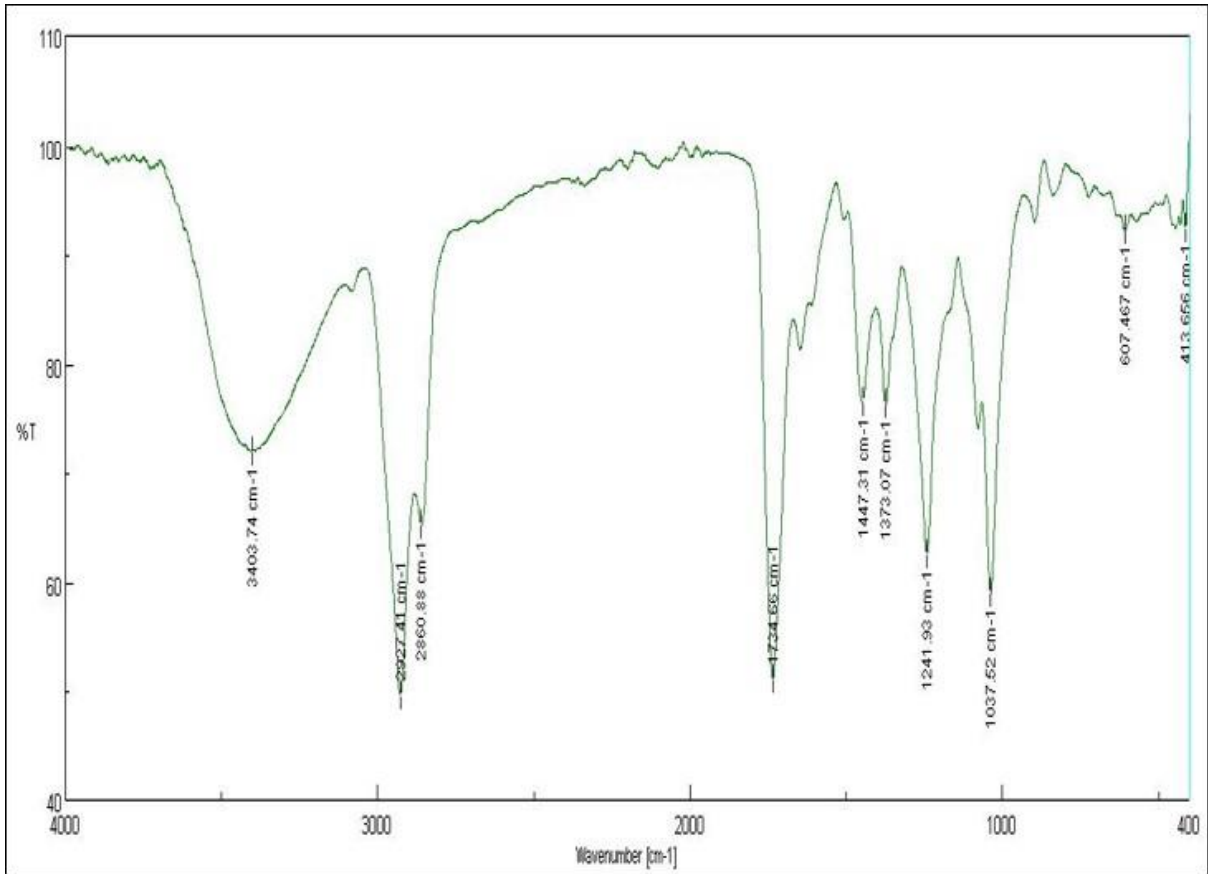

FTIR spectra of CEA extract

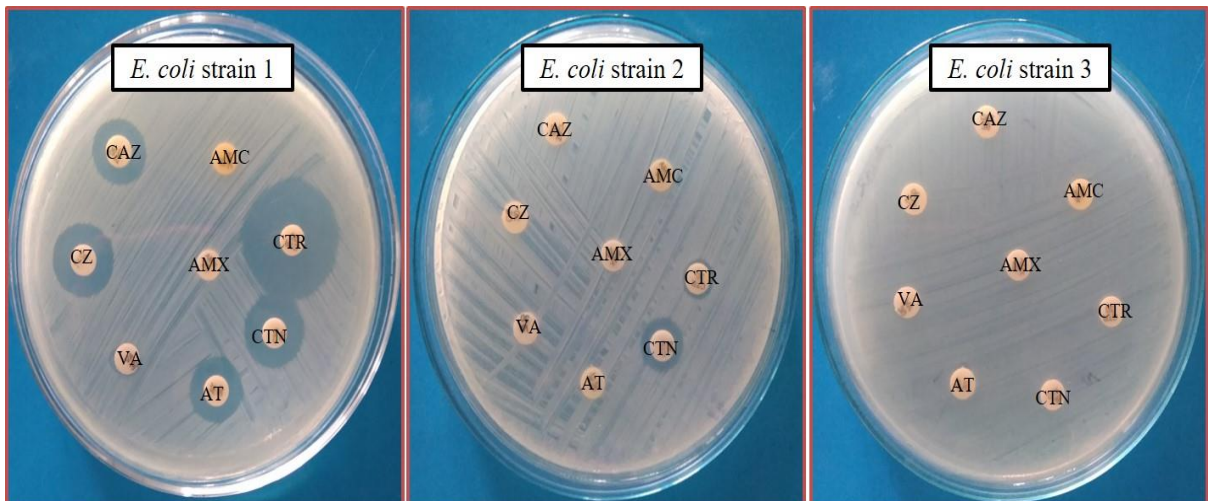

Antibiotic susceptibility of three clinical strains of *E. coli* towards different antibiotics

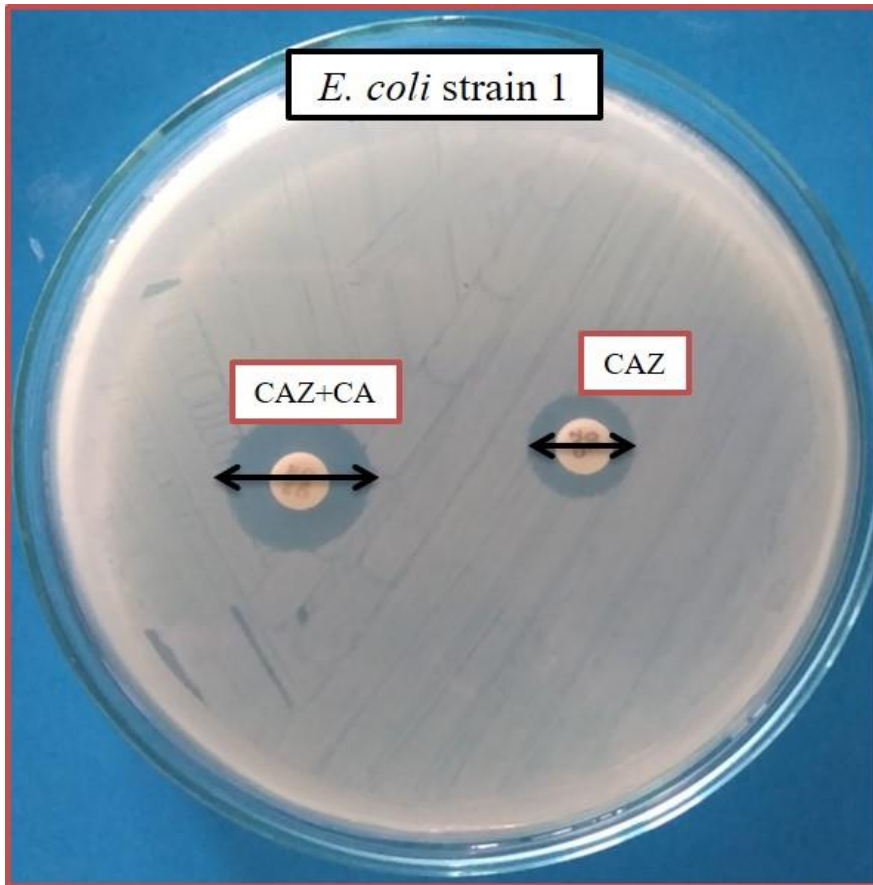

Phenotypic ESBL detection through double disk diffusion method [CAZ = Cefotaxime; CA = Clavulanic acid]
