# Supplementary material for: Efficacy of Andrographis paniculata against extended spectrum β-lactamase (ESBL) producing E. coli
Source: PubMed Central journal article supplement (PMC6122548; doi:10.1186/s12906-018-2312-8), 2018-09-03
Supplement: 12906_2018_2312_MOESM2_ESM.pdf [file 12906_2018_2312_MOESM2_ESM.pdf]

Table: Residues and bond lengths of 10 bioactive compounds of *A. paniculata* docked with CTX-M-15

| S. No | Compound             | Residues | Bond length                                               |
|-------|----------------------|----------|-----------------------------------------------------------|
| 1     | Onysilin             | ASN107   | 3.1 A <sup>0</sup>                                        |
|       |                      | ASN135   | 3.1 A <sup>0</sup>                                        |
| 2     | Neoandrographolide   | ARG257   | 3.3 A <sup>0</sup>                                        |
|       |                      | ALA273   | 1.9 A <sup>0</sup>                                        |
|       |                      | ALA273   | 3.3 A <sup>0</sup>                                        |
|       |                      | PRO170   | 1.9 A <sup>0</sup>                                        |
| 3     | Luteolin             | ASN135   | 2.4 A <sup>0</sup>                                        |
|       |                      | ASN107   | 3.3 A <sup>0</sup>                                        |
|       |                      | ARG257   | 2.3 A <sup>0</sup>                                        |
|       |                      | SER133   | 3 A <sup>0</sup>                                          |
| 4     | Bisandrographolide A | GLY244   | 3.5 A <sup>0</sup>                                        |
|       |                      | ARG257   | 3.3 A <sup>0</sup>                                        |
| 5     | Apigenin             | ASN107   | 3.3 A <sup>0</sup>                                        |
|       |                      | ASN135   | 3.2 A <sup>0</sup>                                        |
| 6     | Andrographolactone   | SER240   | 2.5 A <sup>0</sup>                                        |
| 7     | Andrographiside      | ARG257   | 3.5 A <sup>0</sup>                                        |
|       |                      | ASN135   | 2.2 A <sup>0</sup>                                        |
|       |                      | TYR132   | 2.3 A <sup>0</sup>                                        |
| 8     | Andrographidine C    | SER240   | 3.4A <sup>0</sup> , 2.8A <sup>0</sup> , 2.5A <sup>0</sup> |
|       |                      | SER73    | 3.1A <sup>0</sup> , 3.5A <sup>0</sup>                     |
|       |                      | THR238   | 2A <sup>0</sup> , 3A <sup>0</sup>                         |
|       |                      | TYR108   | 2.8A <sup>0</sup>                                         |
| 9     | Andrographidine A    | ASN107   | 3.5A <sup>0</sup>                                         |
|       |                      | ARG257   | 2.7A <sup>0</sup> , 2.9A <sup>0</sup>                     |
| 10    | Andrograpanin        | ARG257   | 2.6 A <sup>0</sup>                                        |
